# Supplementary material
Source: MDPI journal article supplement (https://www.mdpi.com/2673-4591/37/1/21)
Supplement: s1 [file s1]

---

# Developing Biopolymer Based Edible Films with Improved Anti-Microbial Properties.

Authors: Katyayani Kashyap, Yamini Sudha Sistla, Shumyla Mehraj  
Chemical Engineering Department  
Shiv Nadar Institute of Eminence

---

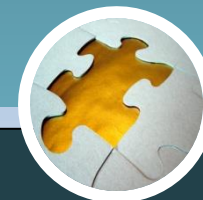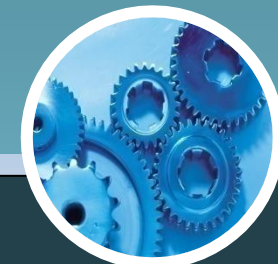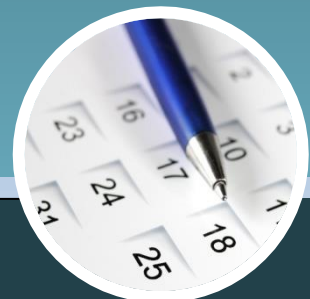

# INTRODUCTION

- ❖ Global market of edible packaging -US\$1004 million with an annual growth rate of 6.3%
- ❖ Packaging contributes one-third to waste generated by industrial sectors
- ❖ Edible coating-An effective measure to tackle the global issue
- ❖ Improves shelf life of consumable items
- ❖ Improves barrier for moisture, gas and microorganism

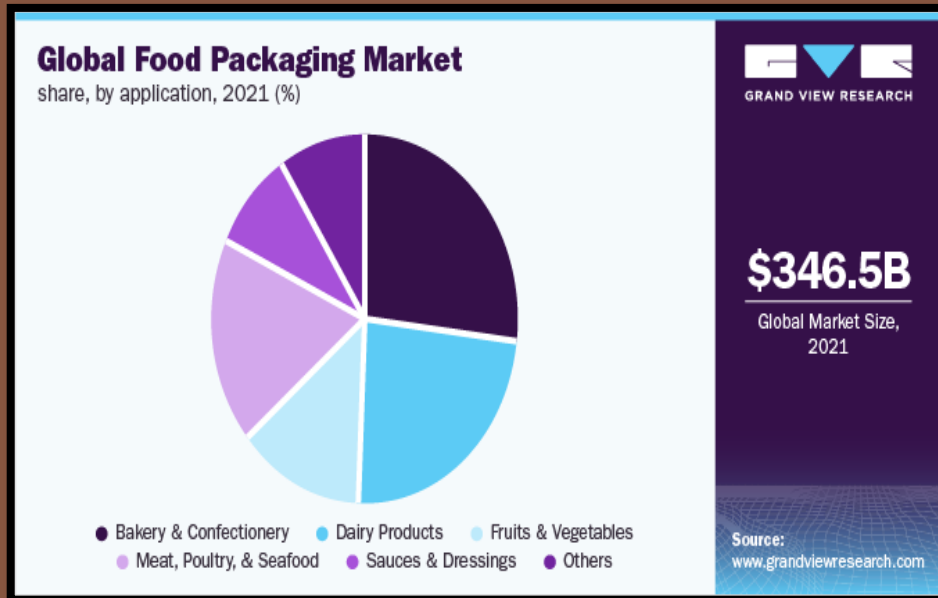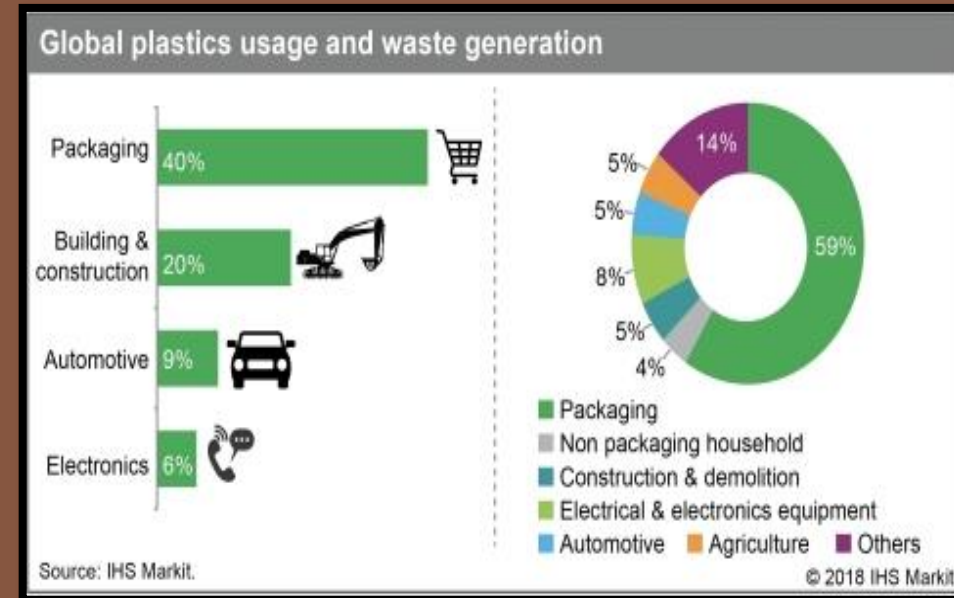

Source : [https://www.grandviewresearch.com/industry-analysis/food-packaging-market\(1\)](https://www.grandviewresearch.com/industry-analysis/food-packaging-market(1))

[https://news.ihsmarkit.com/prviewer/release\\_only/slug/chemicals-plastic-storm-ocean-plastic-waste-brewing-tidal-wave-consumer-activism-and-i\(2\)](https://news.ihsmarkit.com/prviewer/release_only/slug/chemicals-plastic-storm-ocean-plastic-waste-brewing-tidal-wave-consumer-activism-and-i(2))

# METHODOLOGY

- ❑ Multiple trials conducted using varied composition of components.
- ❑ Components weighed and dissolved in distilled water.
- ❑ Solution was homogenized (stirrer) at 40C and pH of 4.2 maintained.
- ❑ Homogenization using ultrasonic sonicator.
- ❑ Poured in petri dish and dried in a humidity chamber (Temp: 40C, Humidity-60%).
- ❑ Peeled off, sealed in pouches and stored in a vacuum desiccator.

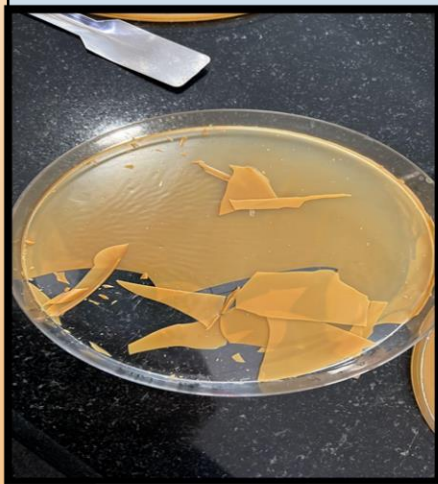

Trial without humidifier

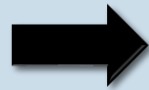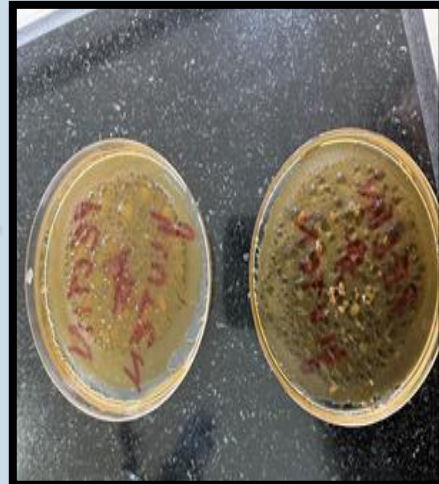

Excess humidity

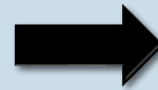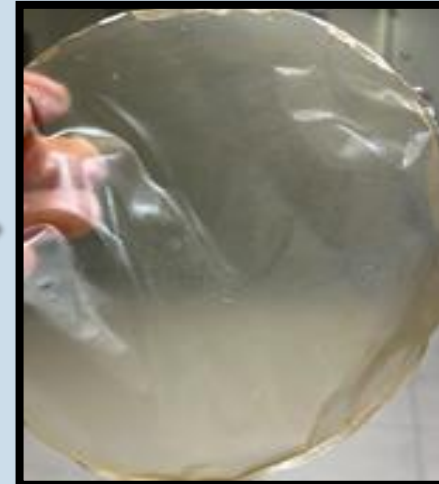

Transparent, flexible thin protein-polysaccharide film

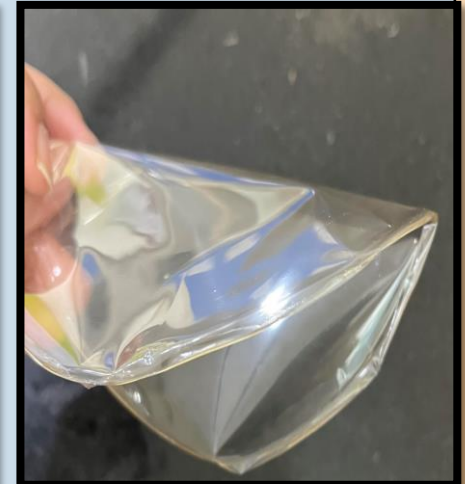

# RESULTS AND DISCUSSIONS contd.,

## □ Design of Experiment

| RUN NO. | GLUTEN(g) | CASTOR OIL(g) |
|---------|-----------|---------------|
| 1       | 0.75(+1)  | 0.125         |
| 2       | 0.25(-1)  | 0.125(-1)     |
| 3       | 0.75      | 0.375(+1)     |
| 4       | 0.25      | 0.375         |
|         |           |               |

## □ FTIR Results

### ❖ DOE based FILM

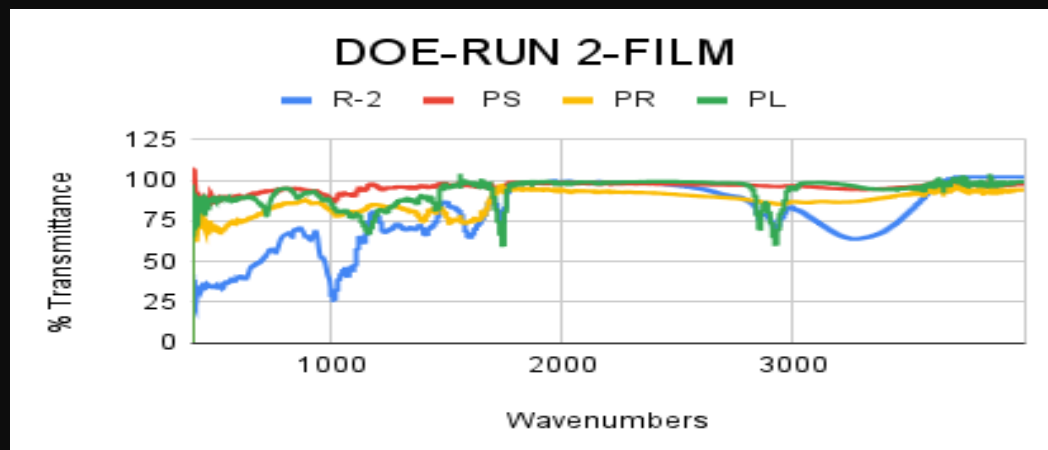

# RESULTS AND DISCUSSION contd.,

## □ Contact Angle

- The results show that in general the hydrophobicity was improved for films based on design of experiment in comparison to control films.

## □ WVTR Test

- Standard specimen size sent to Northern India Textile Research Association and Sree Chitra Tirunal Institute For Medical Sciences & Technology
- Analysis done for the test using water method

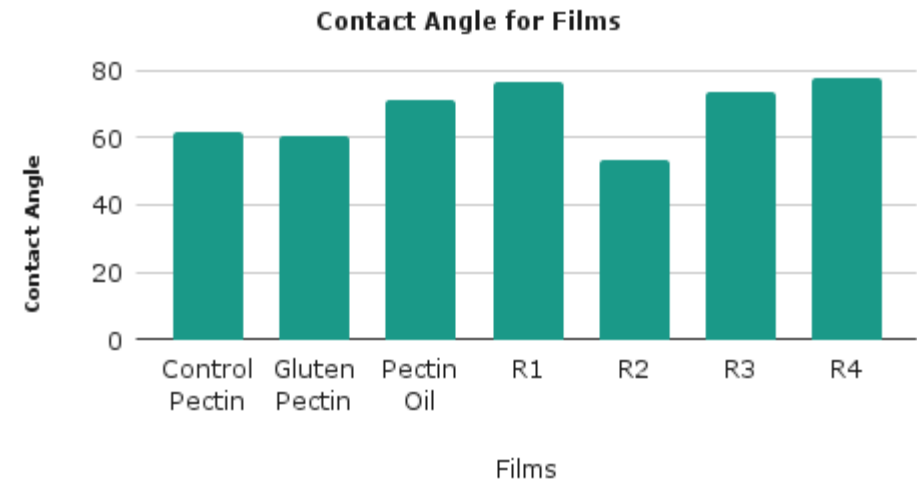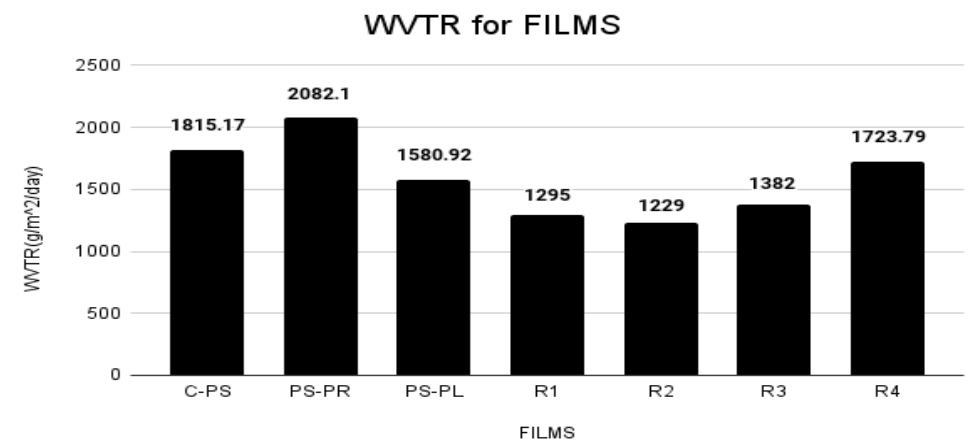

# RESULTS AND DISCUSSION contd.,

## Thickness Test

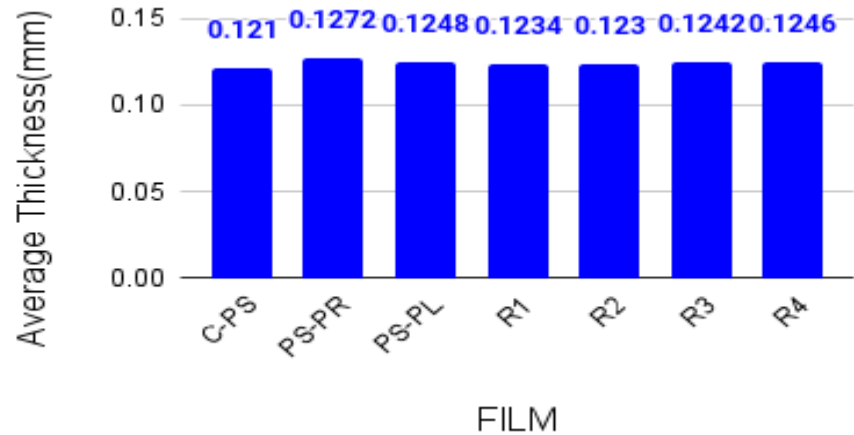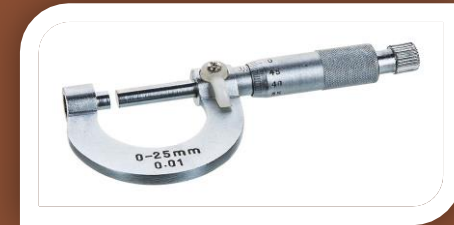

All films were thin and falls in the range of  $0.125 \pm 0.004$  which is in accordance with the std. range ( $\leq 0.25$  mm).

## Transparency Test

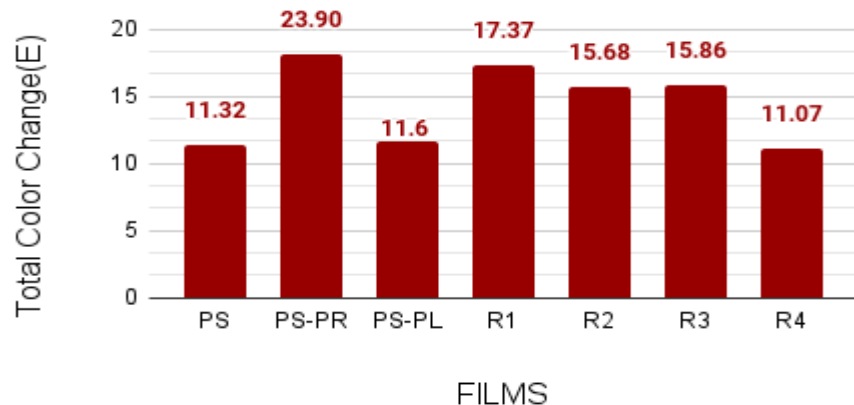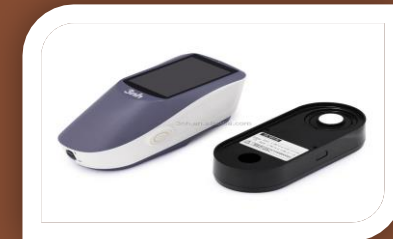

All films were transparent with E ranging between 11-25.  
L-light/dark a-red/green b-yellow/blue

$$\Delta E_{ab}^* = \sqrt{(L_2^* - L_1^*)^2 + (a_2^* - a_1^*)^2 + (b_2^* - b_1^*)^2}$$

where  $L_2^*, a_2^*, b_2^*$  are values of reference transparent film and  $L_1^*, a_1^*, b_1^*$  are values of prepared films

# RESULTS AND DISCUSSION

## ➤ Mechanical Properties

- ❑ Film R2 had the highest tensile strength.
- ❑ Film R4 had the maximum load at break.
- ❑ Lower gluten content with higher plasticizer content may improve mechanical properties.
- ❑ Film R3 had the lowest tensile strength and load at break.
- ❑ Higher plasticizer content may not always improve mechanical properties.
- ❑ Optimizing the gluten and plasticizer content can lead to films with improved mechanical properties.

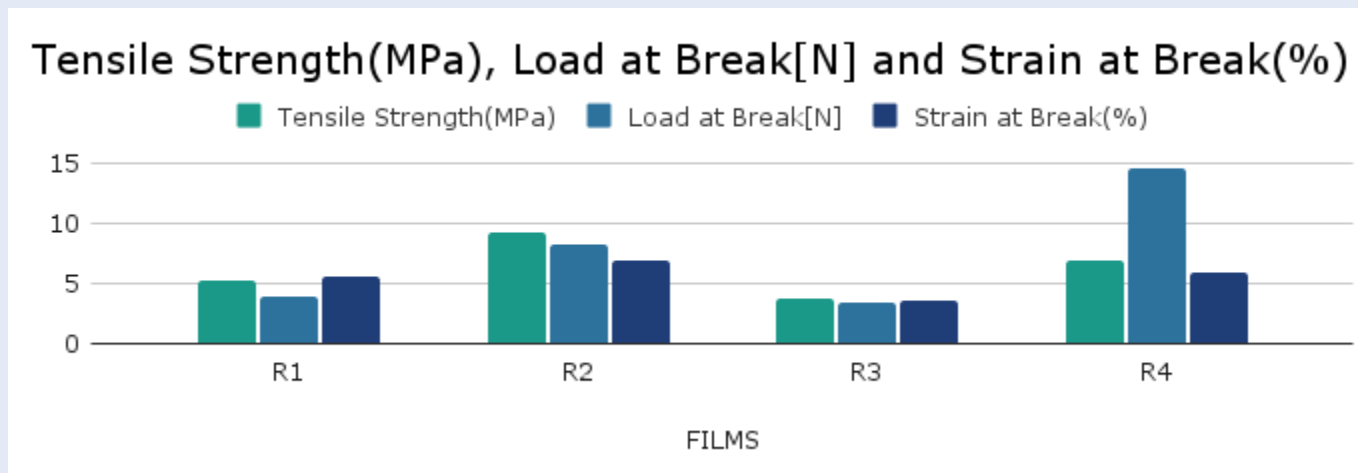

# RESULTS AND DISCUSSIONS contd.,

## □ BIODEGRADABILITY

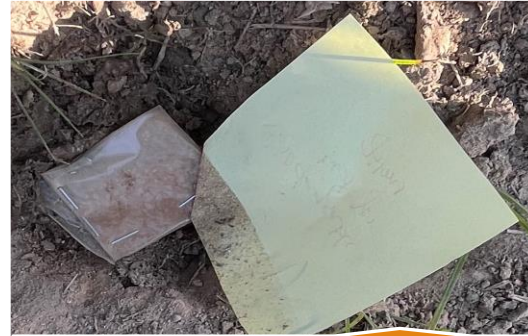

Film sown in soil

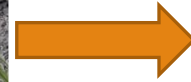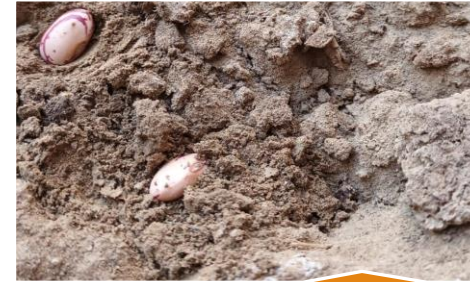

In 15hrs, film was biodegraded

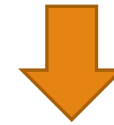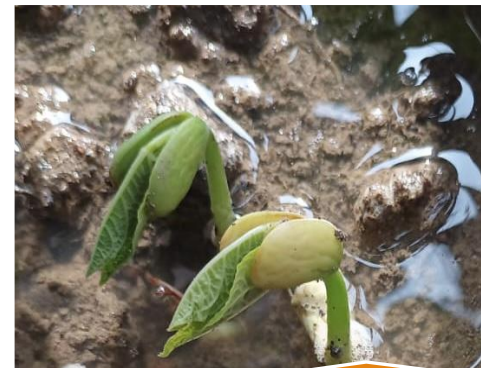

Germination(Day-5)

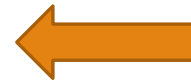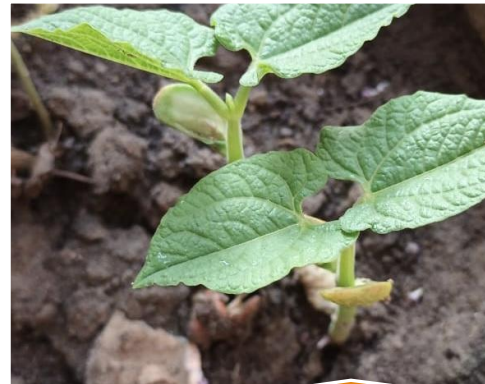

Leaves grown(DAY-7)



# RESULTS AND DISCUSSIONS contd.,

## □ Coating on fruits and vegetable

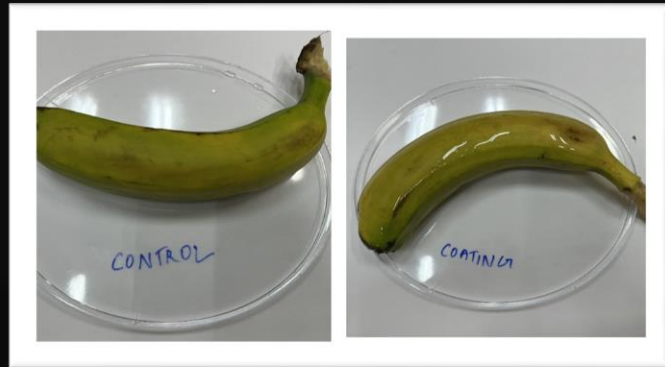

Day-1

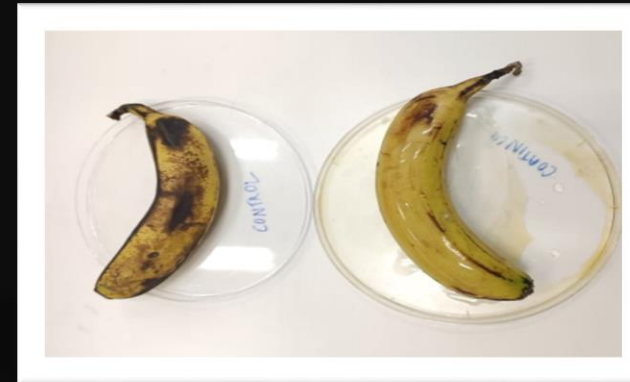

Day-6

## □ Antimicrobial Test

**Bacteria Used:** E. coli

**Purpose:** To prove improved anti-microbial property using growth of inhibition

**Result:** Zone of inhibition was formed of 3.2 cm against well created of 1 mm in which film solution was added

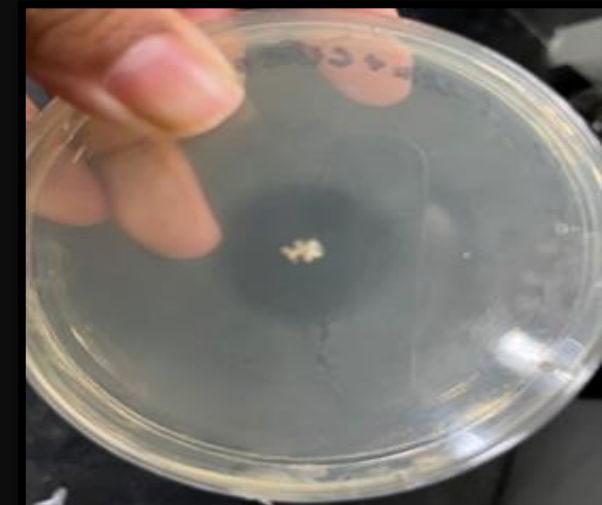

# CONCLUSIONS

- ❑ The polysaccharide-polymer films were successfully developed with plasticizer range between 5% to 15% and protein range between 10% to 30%.
- ❑ All films made including control films were thin, flexible and transparent
- ❑ Films based on DOE compared to control films showed:
  - Improved barrier properties
  - Improved shelf life
  - Improved hydrophobic properties
  - Biodegradability and anti-microbial properties
- ❑ All films were completely soluble in water
- ❑ Moisture content for all films ranged between 0.05-1%
- ❑ FTIR spectra provides information regarding material state and new bond formation for the samples
- ❑ Polysaccharide based edible films- An environmental friendly alternative to petroleum-based polymers

# REFERENCES

- Abrial, H., Basri, A., Muhammad, F., Fernando, Y., Hafizulhaq, F., Mahardika, M., Sugiatri, 12 E., Sapuan, S. M., Ilyas, R. A., & Stephane, I. (2019). A simple method for improving the 13 properties of the sago starch films prepared by using ultrasonication treatment. *Food Hydrocolloids*, 93, 276–283.
- J. Bai & A. Plotto, Coating for fresh fruits and vegetables, In edible coating and films to improve food quality, Edited by Jinhe Bai CRC Press, pp. 186-248 (2012)
- E.A. Baldwin, M.O. Nesperos-Carriedo & R.A. Baker, Use of edible coating to preserve quality of lightly and slightly processed product, *Crit. Rev. Food Sc. Nutri.* 35, pp. 509-552 (1995)
- W. Borchard, A. Kenning, A. Kapp & C. Mayer, Phase diagram of the system sodium alginate/water: A model for biofilms, *Int. J. Boil. Macromol.*; (2005)
- F. Debeaufort, G.J.A. Quezada & A. Voilley, Edible films and coating: Tomorrow's packaging: A review, *Crit. Rev. Food Sc. and Nutri.* 38, pp. 299-313 (1998).
- L.J. Harris, J.N. Farber, L.R. Beuchat, M.E. Paris, T.V. Suslow, E.H. Garrett & F.F. Buster, Outbreak association with fresh produce, *Compre. Rev. Food Sc.* 78-141 (2003)
- J.J. Kester & O.R. Fennema, Edible films and coatings: A review, *Food tech.*, 40, pp. 47-49 (1986)

THANK YOU
